# Supplementary material for: Correction: The New Face of the Old Molecules: Crustin Pm4 and Transglutaminase Type I Serving as RNPs Down-Regulate Astakine-Mediated Hematopoiesis
Source: PubMed Central journal article supplement (PMC5531430; doi:10.1371/journal.pone.0182405), 2017-07-27

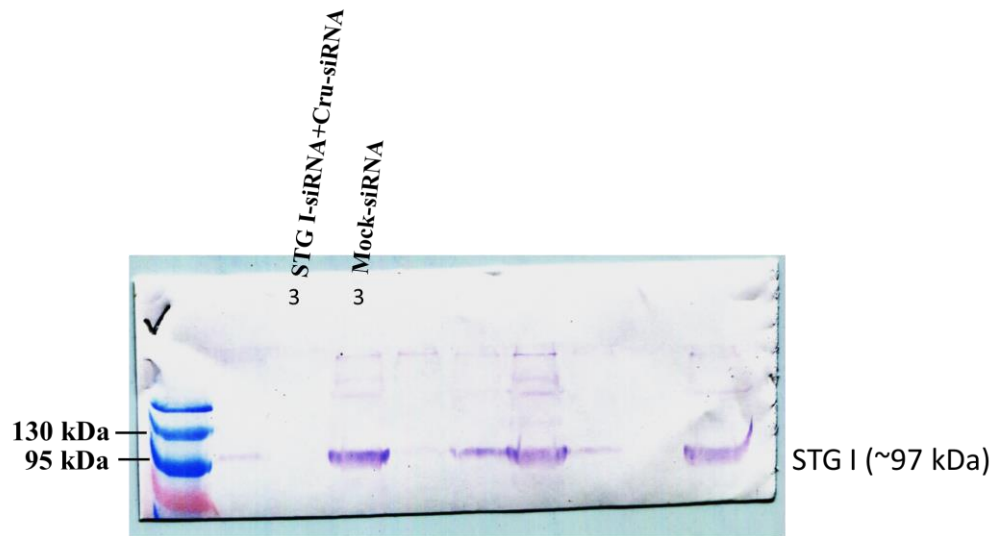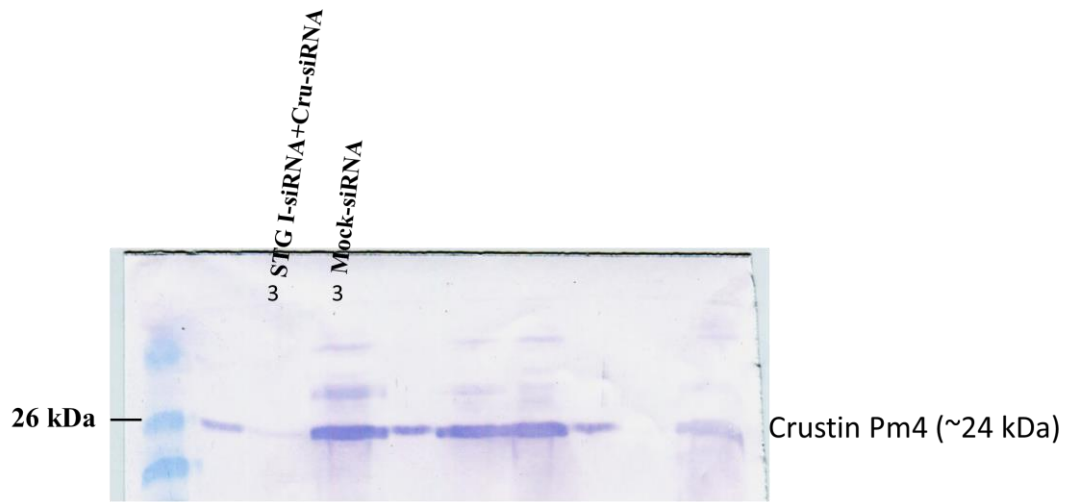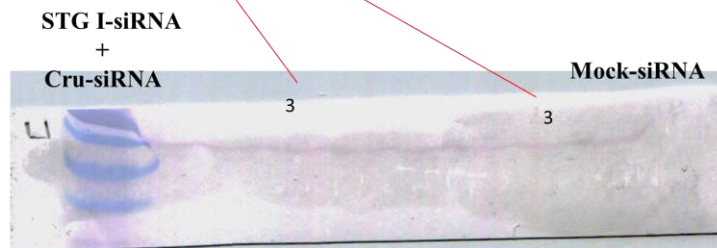

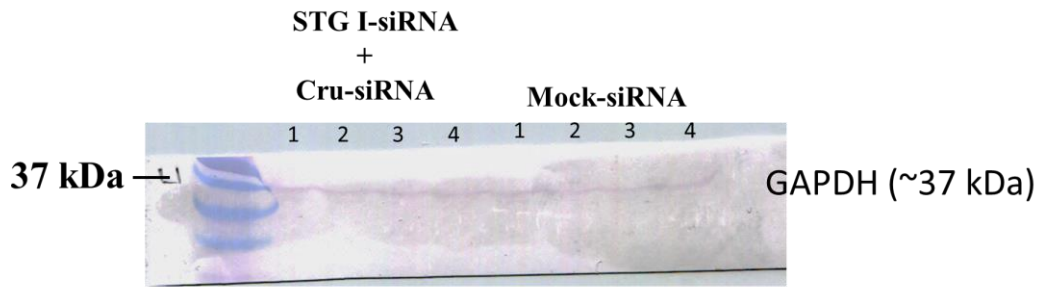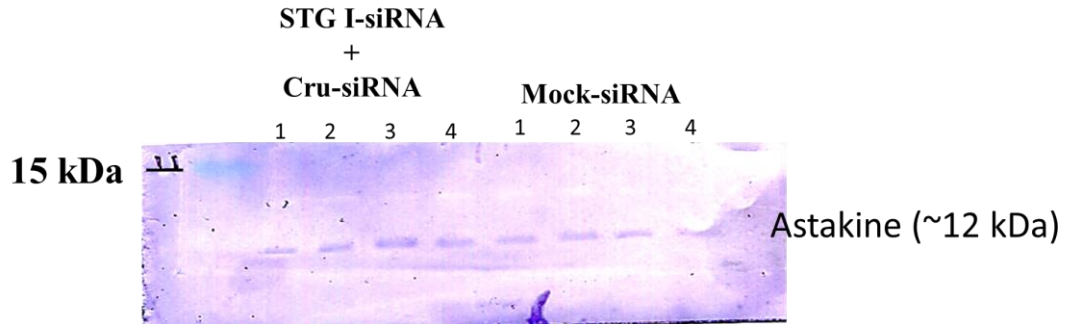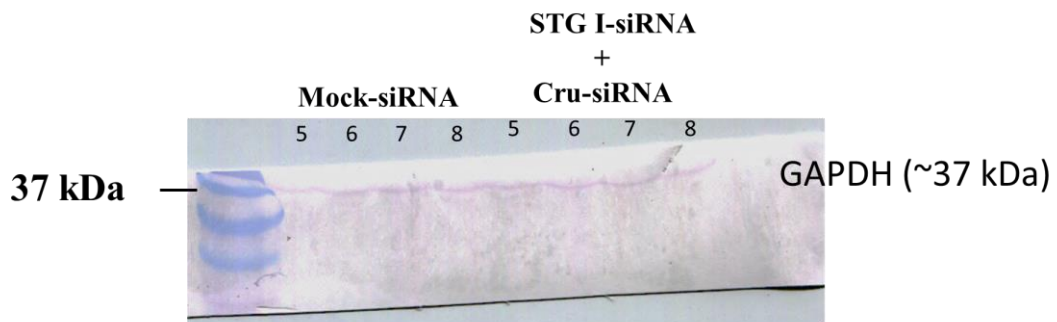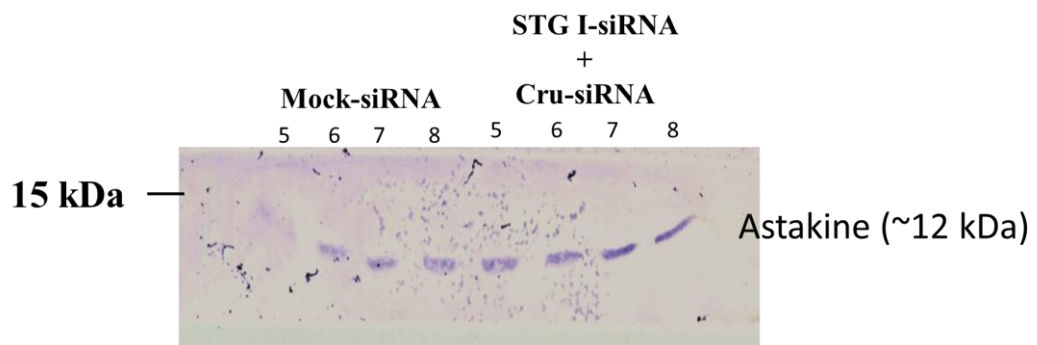

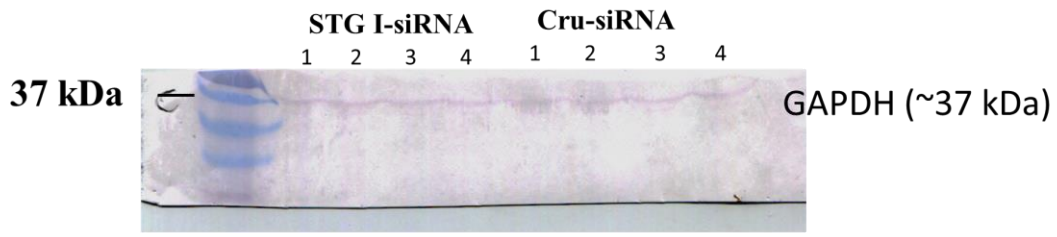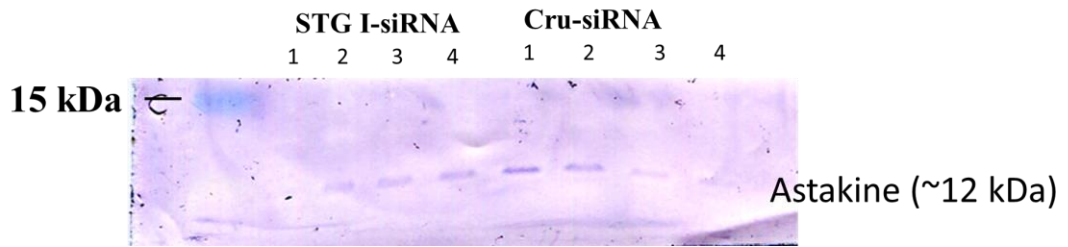

Supplement: pone.0182405.s001.pdf [file pone.0182405.s001.pdf]
